# Supplementary material for: Metabolomics reveals altered biochemical phenotype of an invasive plant with potential to impair its biocontrol agent’s establishment and effectiveness
Source: PubMed Central journal article supplement — Sci Rep. 2024 Nov 7;14:27150. doi: 10.1038/s41598-024-76228-w (PMC11543852; doi:10.1038/s41598-024-76228-w), 2024-11-07
Supplement: 41598_2024_76228_MOESM84_ESM.pdf [file 41598_2024_76228_MOESM84_ESM.pdf]

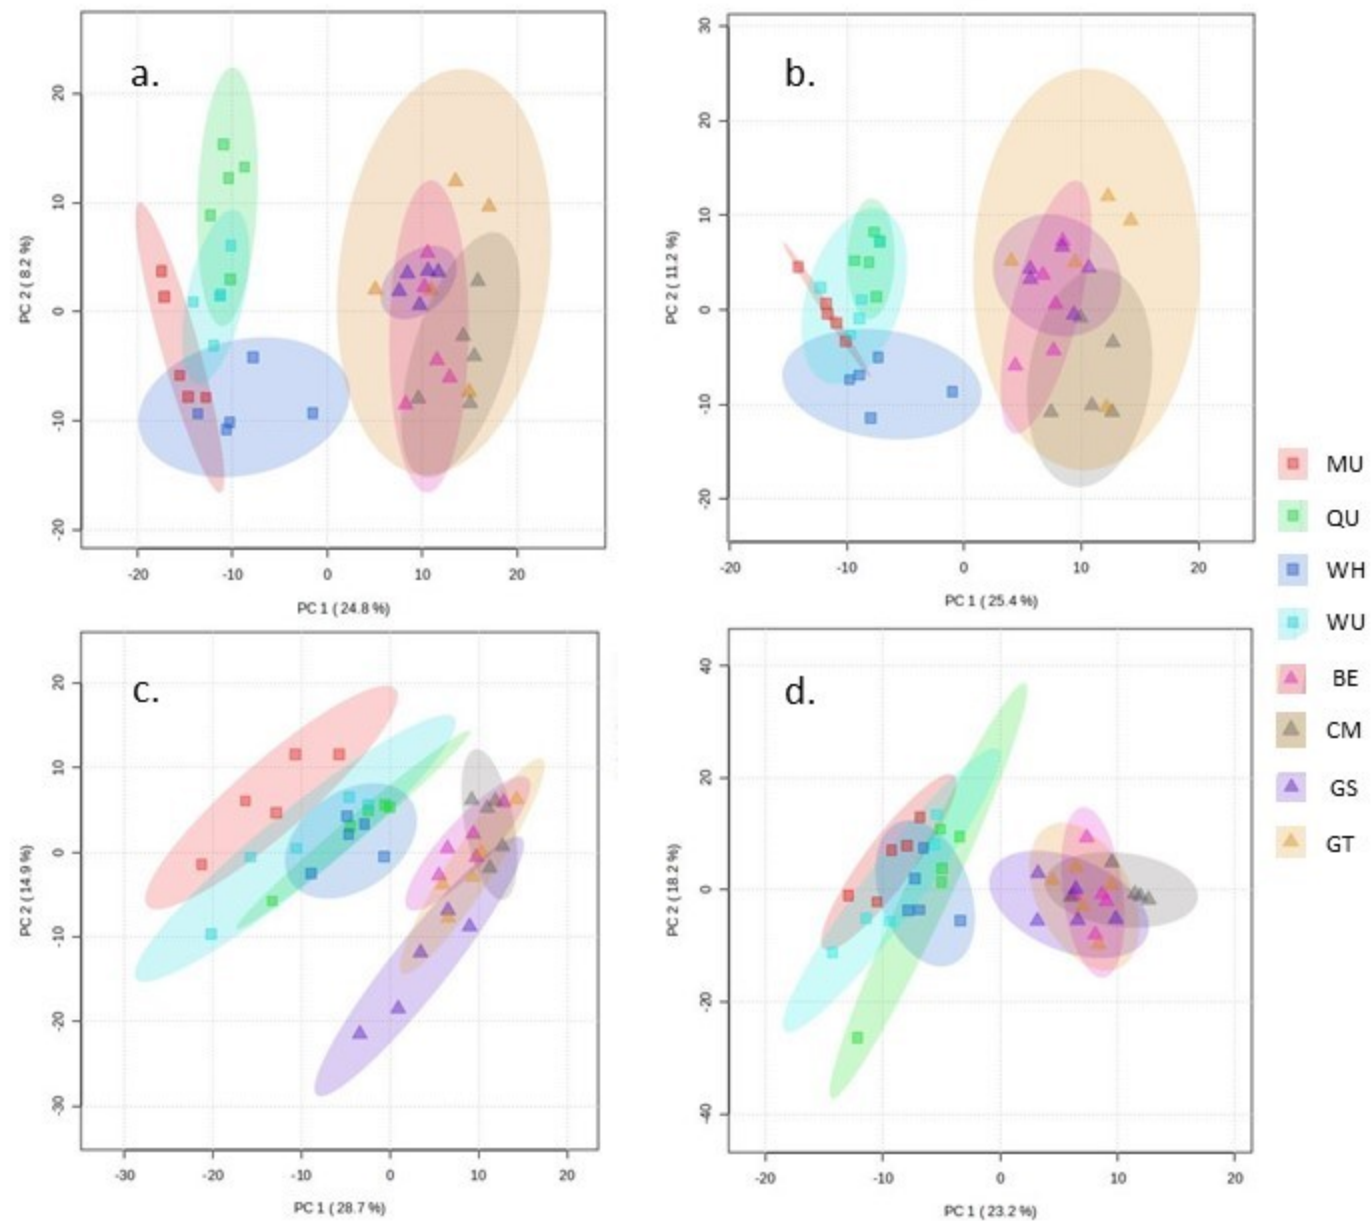

Supplementary Fig 2. Multiple PCA graphics for all NZ and SC sites in a. C18pos, b. C18neg, c. HILCpos and d. HILCneg. All demonstrate clearly separate clustering of the NZ and SC ranges. PC 1 and PC 2 demonstrate the observed variance between clusters. All analyses are validated using [PERMANOVA]  $p = 0.001$ . Square points represent New Zealand sites and triangles represent Scotland sites.
