# Supplementary material for: Metabolomics reveals altered biochemical phenotype of an invasive plant with potential to impair its biocontrol agent’s establishment and effectiveness
Source: PubMed Central journal article supplement — Sci Rep. 2024 Nov 7;14:27150. doi: 10.1038/s41598-024-76228-w (PMC11543852; doi:10.1038/s41598-024-76228-w), 2024-11-07
Supplement: 41598_2024_76228_MOESM85_ESM.pdf [file 41598_2024_76228_MOESM85_ESM.pdf]

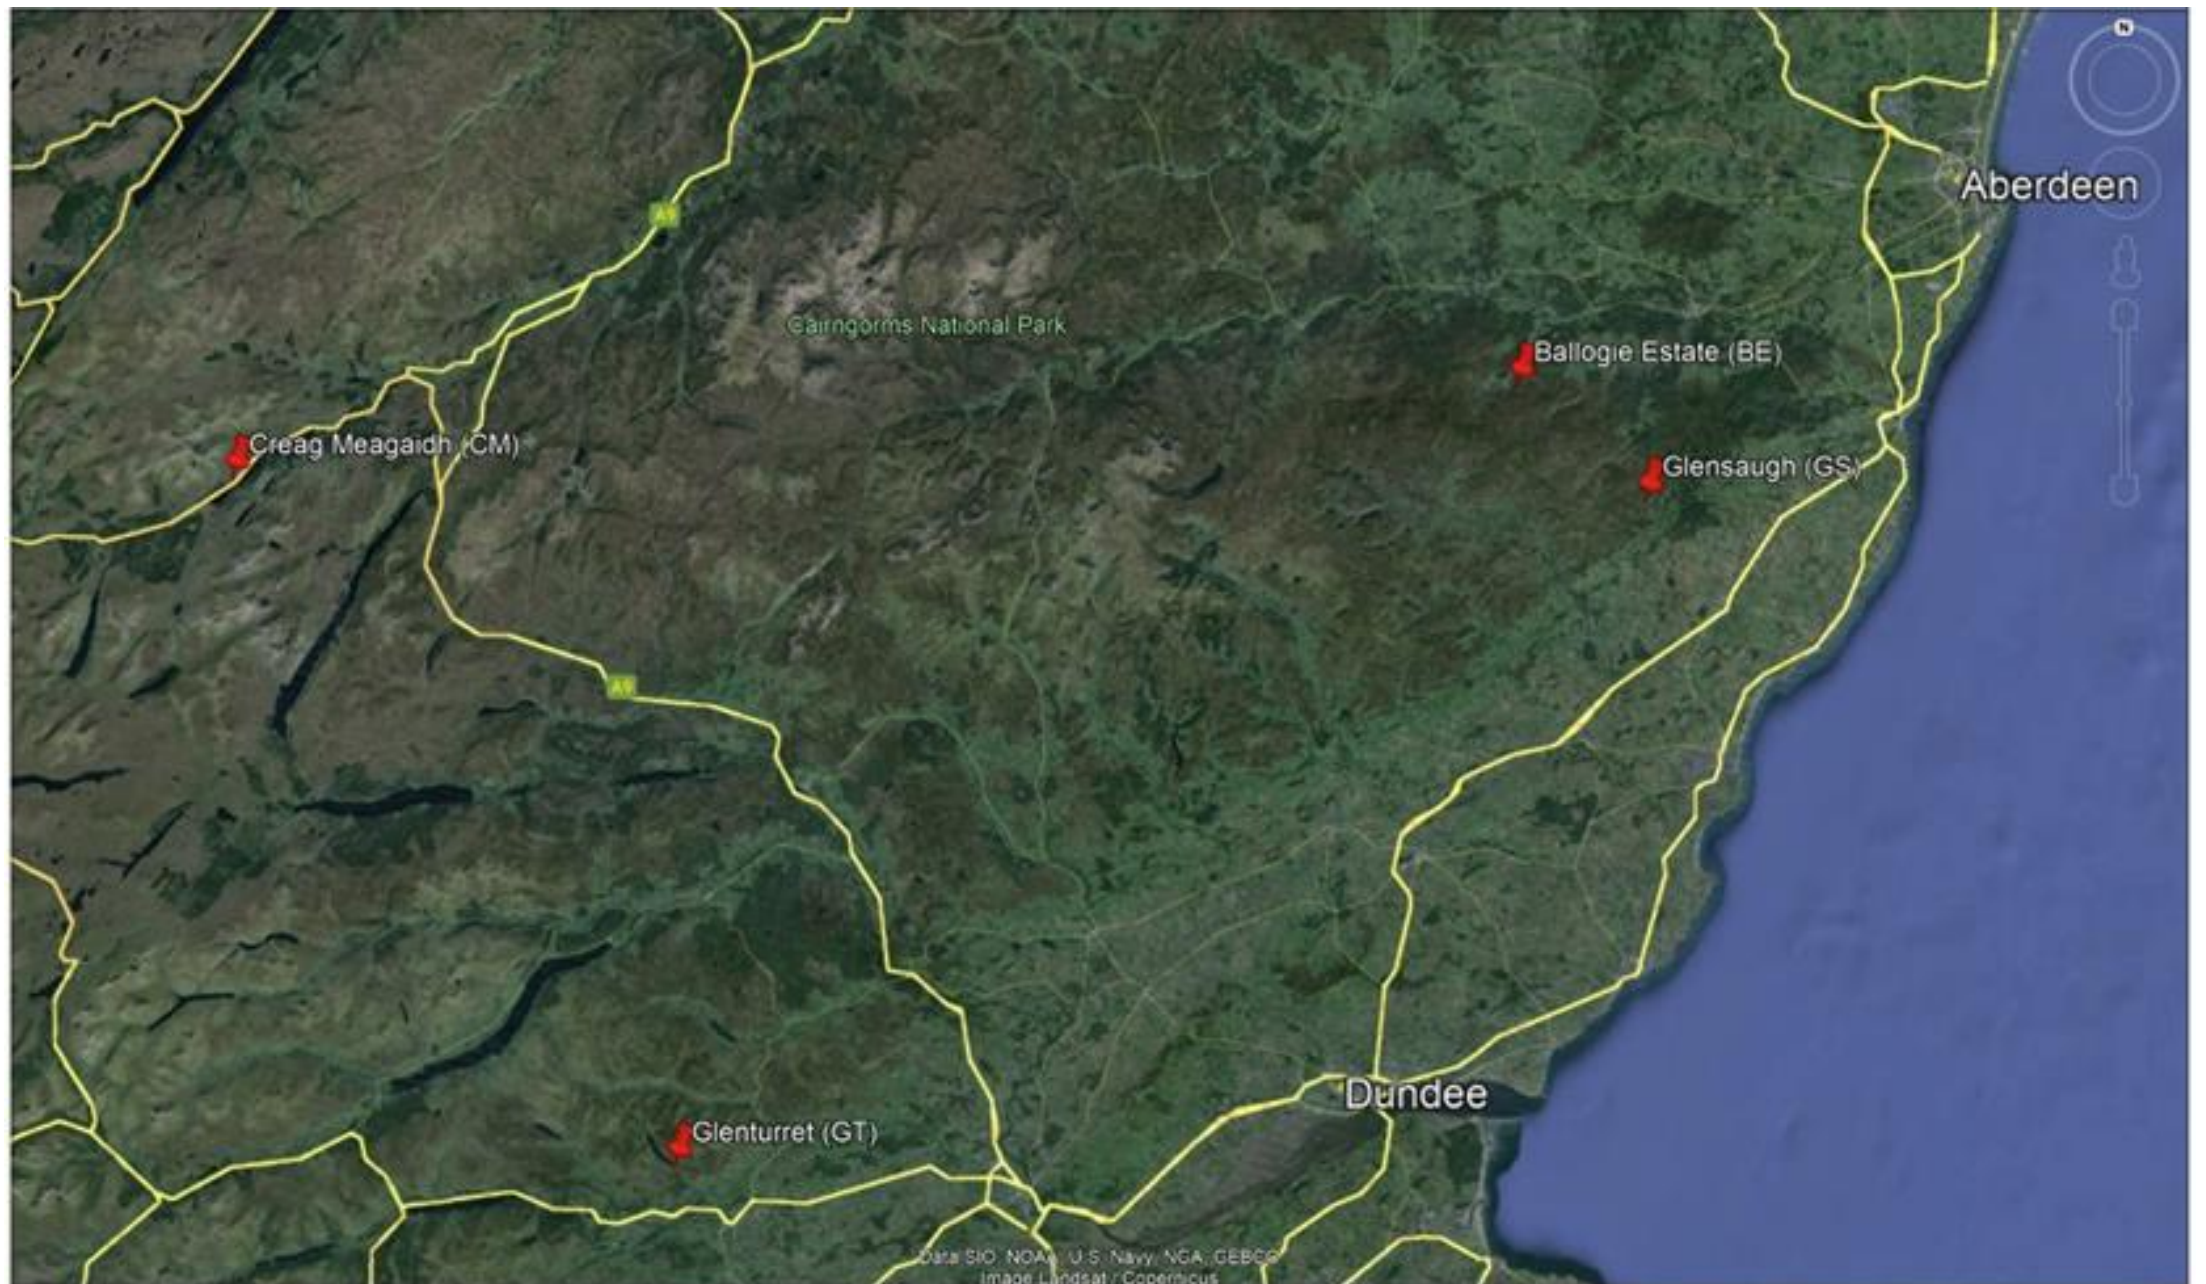

**S Fig. 3a.** Study sites located in Scotland UK. Altitudes are GS 323, BE 316, GT 351 and CM 291 masl.



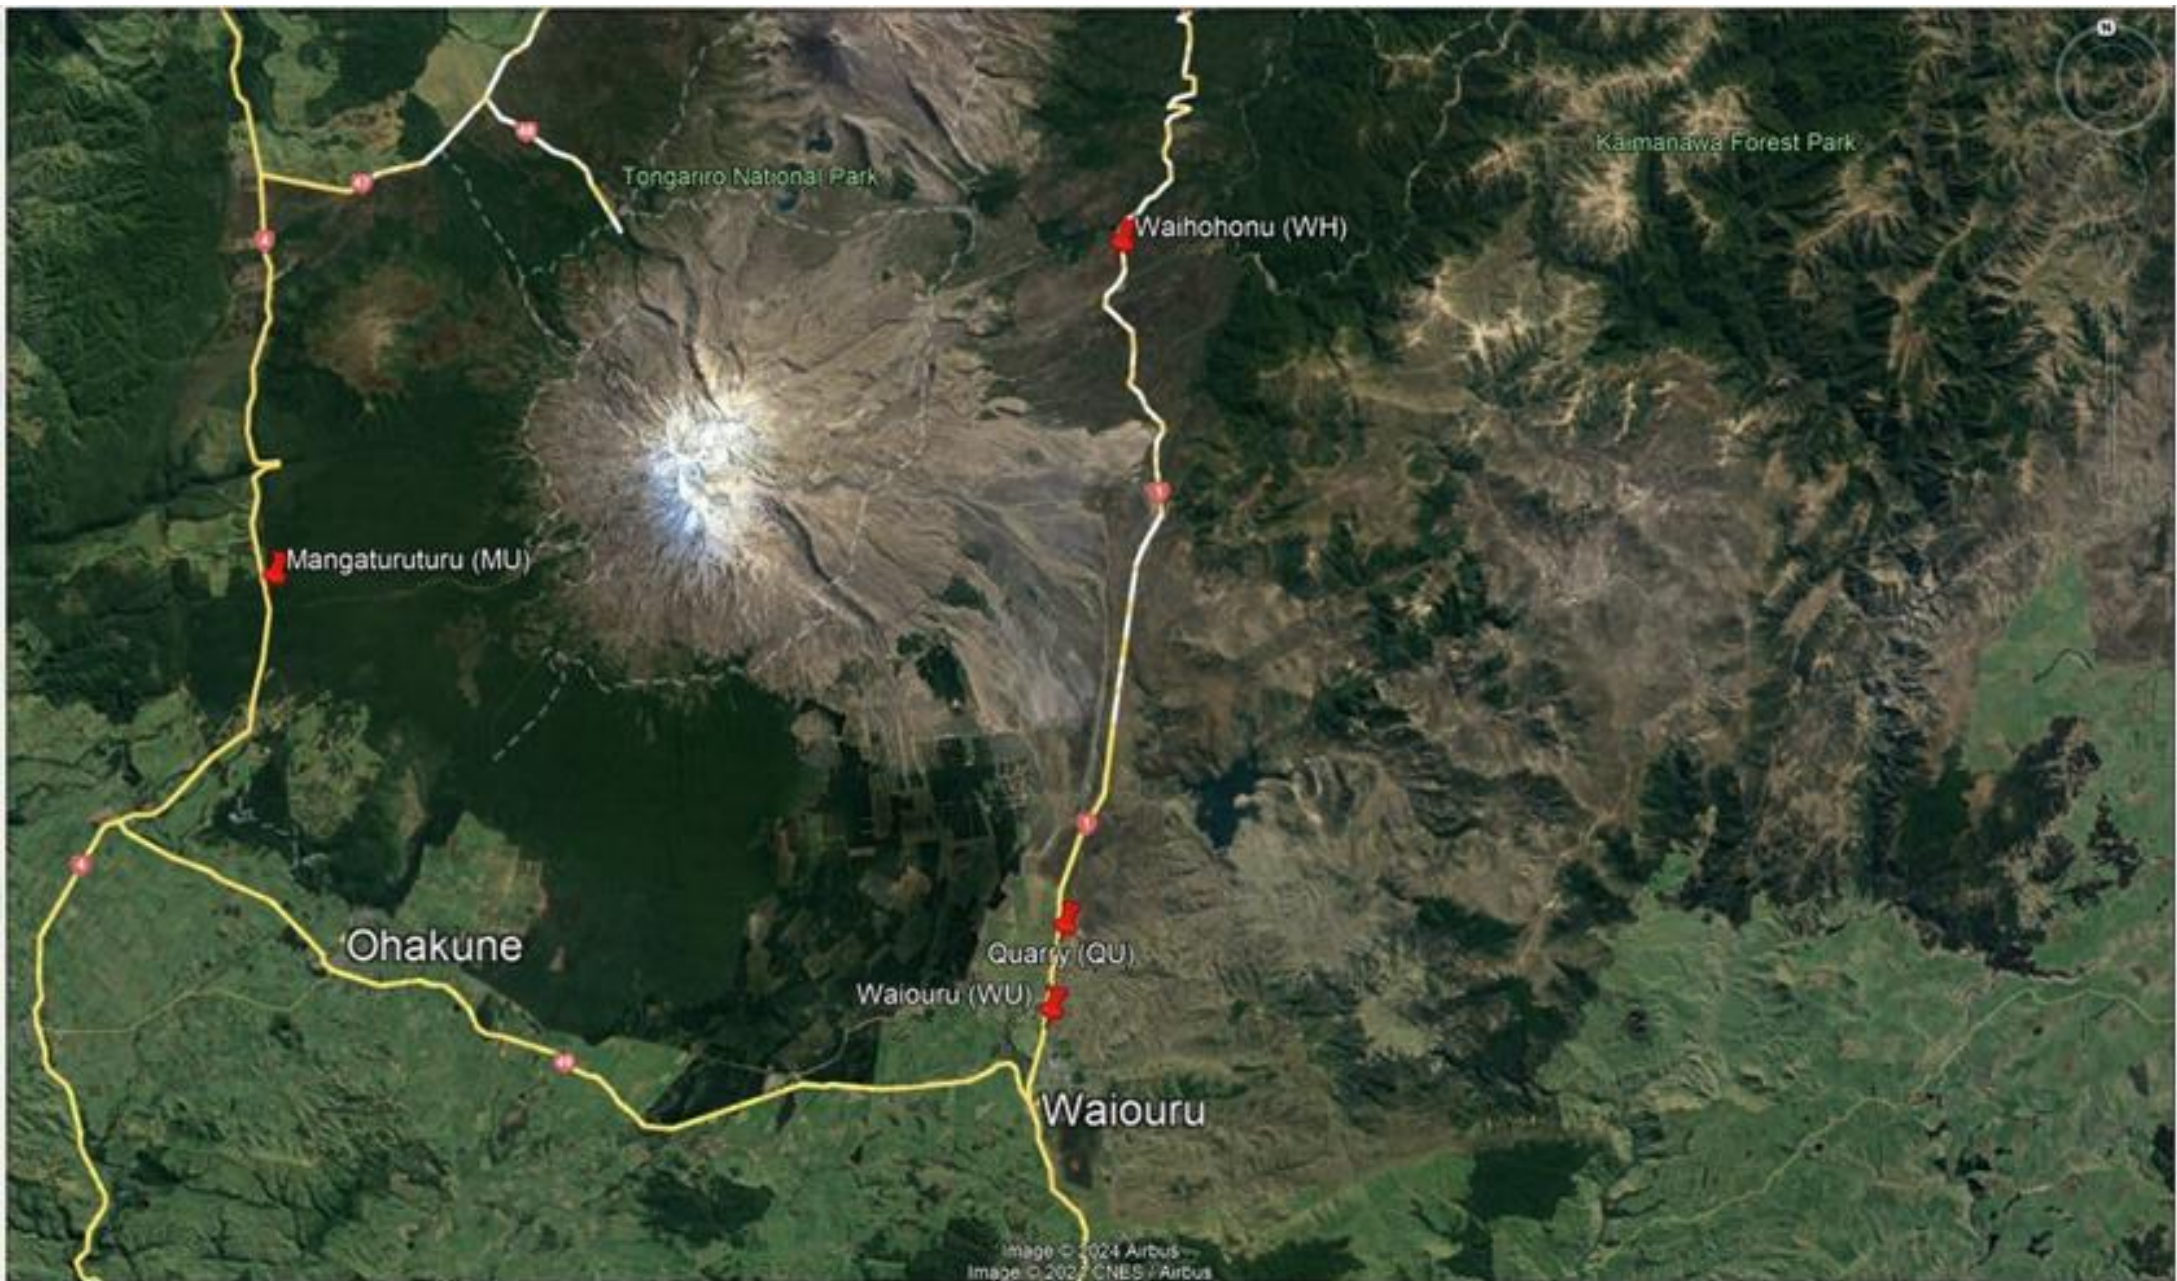

**S Fig. 3b.** Study sites located at New Zealand's Nth. Is. CP. Altitudes are WU 814, QU 881, WH 975 and MU 817 masl.
